# Supplementary material for: An end-to-end framework for real-time automatic sleep stage classification
Source: Sleep. 2018 Mar 26;41(5):zsy041. doi: 10.1093/sleep/zsy041 (PMC5946920; doi:10.1093/sleep/zsy041)
Supplement: Supplementary Table S1 [file zsy041_suppl_supplementary_table_s1.pdf]

| layer number | Type    | filter support | filter dimension | no. of filters | stride | data size | weights |
|--------------|---------|----------------|------------------|----------------|--------|-----------|---------|
| input        | n/a     | n/a            | n/a              | n/a            | n/a    | 32x32x3   | n/a     |
| L1           | conv    | 3X3            | 3                | 32             | 1      | 30X30X32  | 896     |
| L2           | RELU    | 1X1            | n/a              | n/a            | 1      | 30X30X32  | n/a     |
| L3           | conv    | 3X3            | 32               | 32             | 1      | 28X28X32  | 9248    |
| L4           | RELU    | 1X1            | n/a              | n/a            | 1      | 28X28X32  | n/a     |
| L5           | conv    | 3X3            | 32               | 32             | 2      | 13X13X32  | 9248    |
| L6           | RELU    | 1X1            | n/a              | n/a            | 1      | 13X13X32  | n/a     |
| L7           | conv    | 3X3            | 32               | 64             | 1      | 11X11X64  | 18496   |
| L8           | RELU    | 1X1            | n/a              | n/a            | 1      | 11X11X64  | n/a     |
| L9           | conv    | 3X3            | 64               | 64             | 1      | 9X9X64    | 36928   |
| L10          | RELU    | 1X1            | n/a              | n/a            | 1      | 9X9X64    | n/a     |
| L11          | conv    | 3X3            | 64               | 64             | 2      | 4X4X64    | 36928   |
| L12          | RELU    | 1X1            | n/a              | n/a            | 1      | 4X4X64    | n/a     |
| L13          | conv    | 4X4            | 64               | 64             | 1      | 64        | 65600   |
| L14          | RELU    | 1              | n/a              | n/a            | 1      | 64        | n/a     |
| L15          | conv    | 1              | 64               | 5              | 1      | 5         | 325     |
| L16          | softmax | 1              | n/a              | n/a            | 1      | 5         | n/a     |
| output       | n/a     | n/a            | n/a              | n/a            | n/a    | 6         | n/a     |
