# Supplementary material for: An end-to-end framework for real-time automatic sleep stage classification
Source: PubMed Central journal article supplement (PMC5946920; doi:10.1093/sleep/zsy041), 2018-03-26
Supplement: zsy041_suppl_supplementary_figure_s1.pdf [file zsy041_suppl_supplementary_figure_s1.pdf]

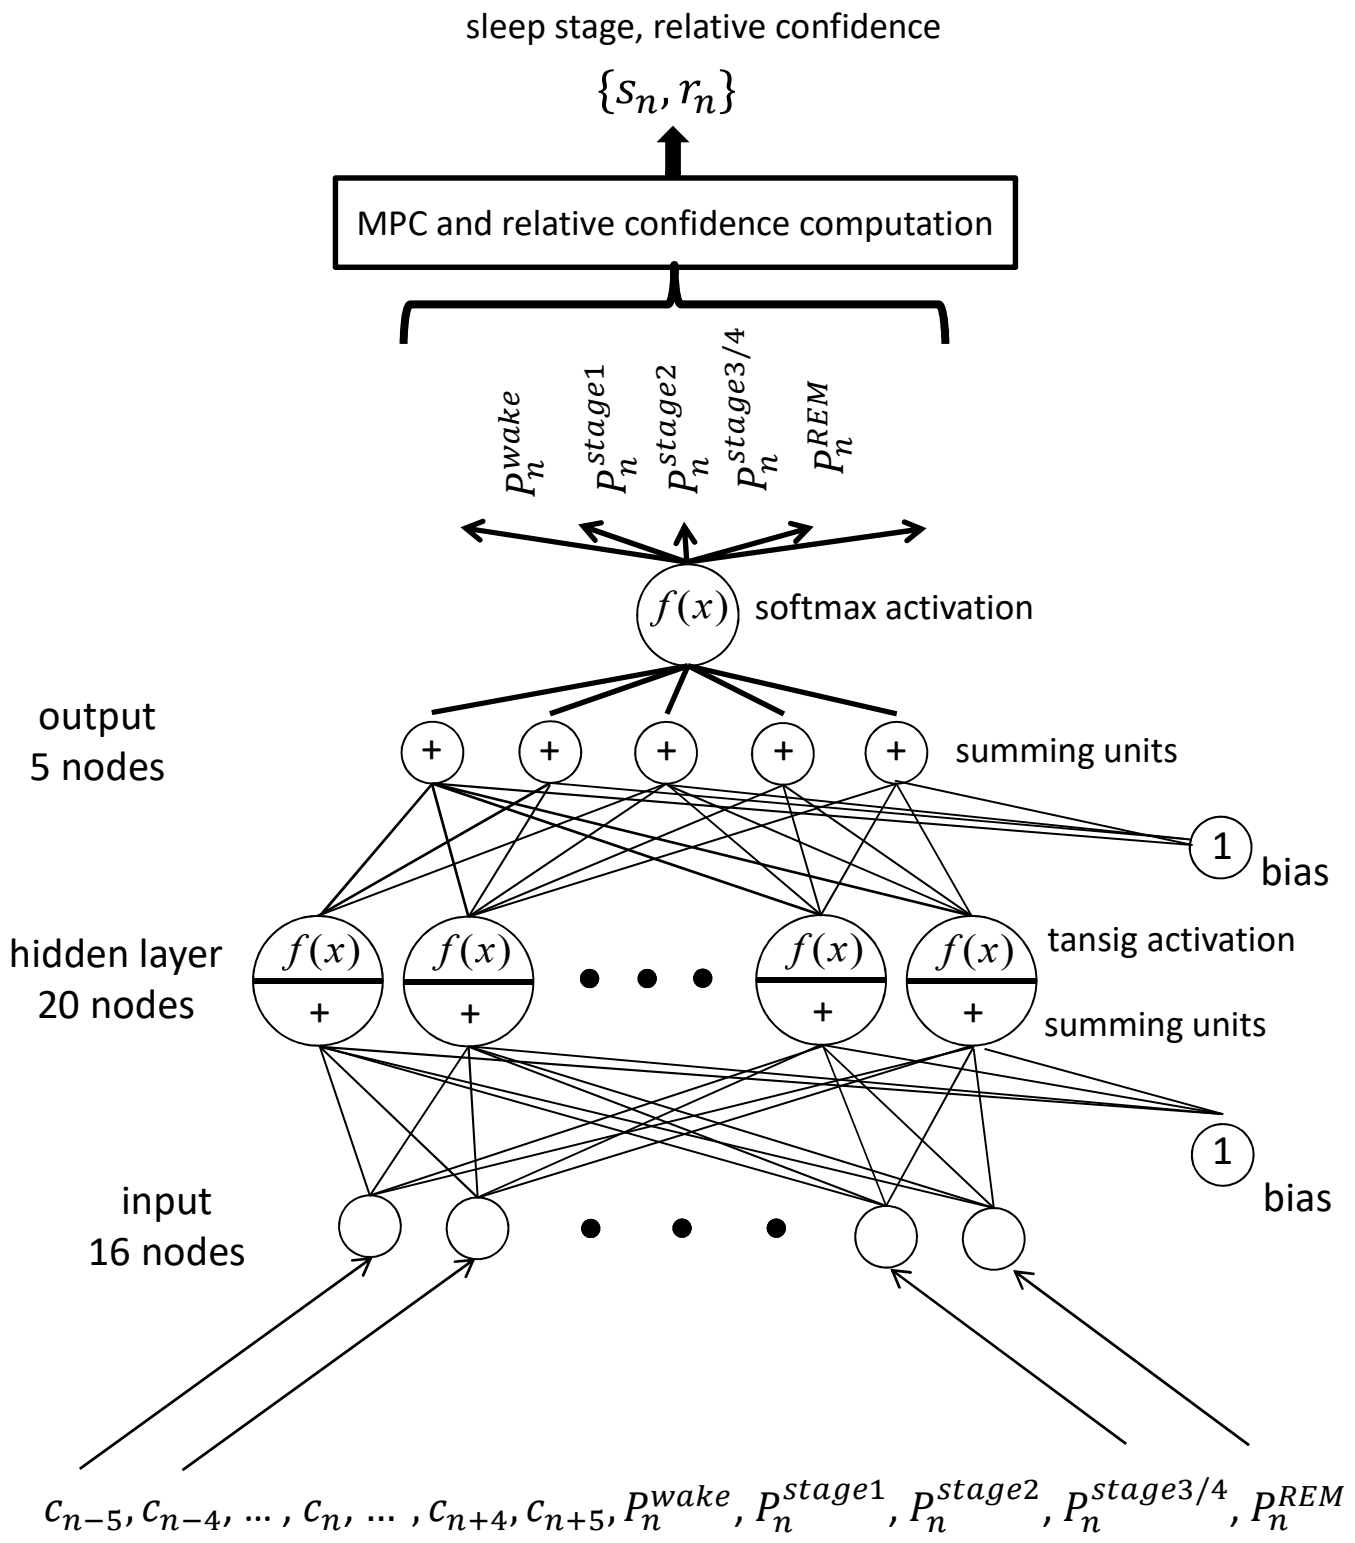

classification block 2
