# Supplementary material for: An end-to-end framework for real-time automatic sleep stage classification
Source: PubMed Central journal article supplement (PMC5946920; doi:10.1093/sleep/zsy041), 2018-03-26
Supplement: zsy041_suppl_supplementary_figure_s3.pdf [file zsy041_suppl_supplementary_figure_s3.pdf]

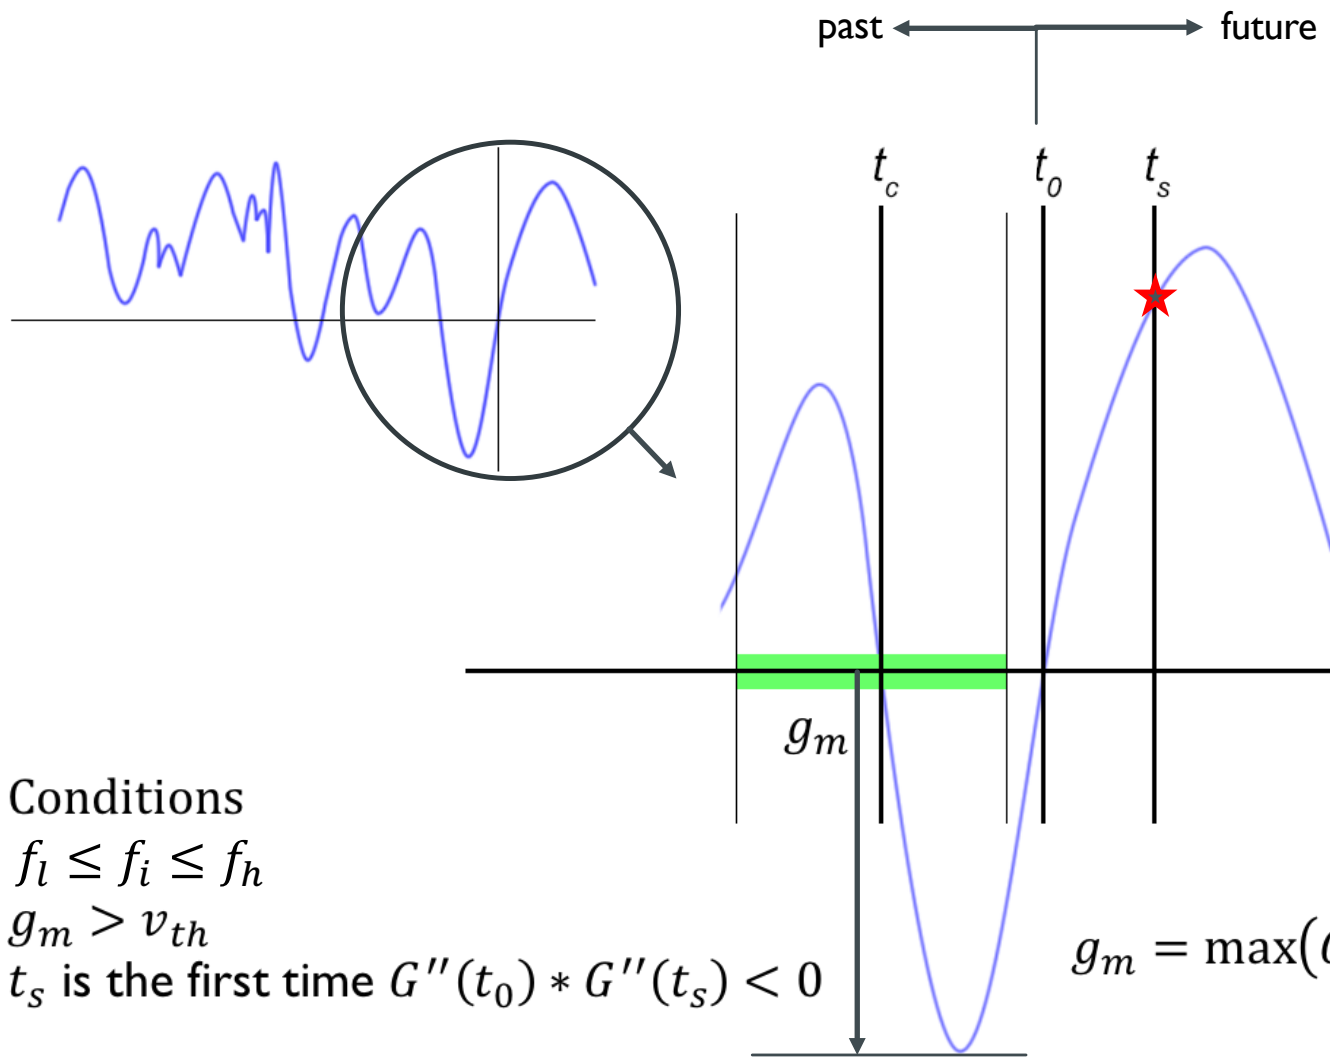

$G(t)$ : EEG waveform  
 $f_l$ : lower cut-off  
 $f_h$ : higher cut-off  
 $t_0$ : current time  
 $t_c$ : last time  $G(t_0) = G(t_c)$

$$f_i = \frac{1}{2(t_0 - t_c)}$$

Conditions

$$f_l \leq f_i \leq f_h$$

$$g_m > v_{th}$$

$t_s$  is the first time  $G''(t_0) * G''(t_s) < 0$

$$g_m = \max(G(t_0) - G(t)), t_c \leq t \leq t_0$$
